# Supplementary material for: Offline replay supports planning in human reinforcement learning
Source: eLife journal article supplement (doi:10.7554/elife.32548), 2018-12-14

A

Control

Revaluation

Noiseless Rewards

Noisy Rewards

B

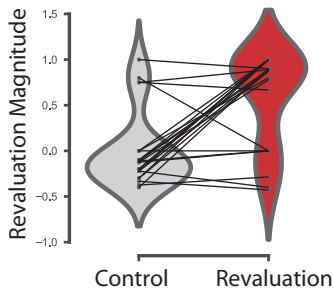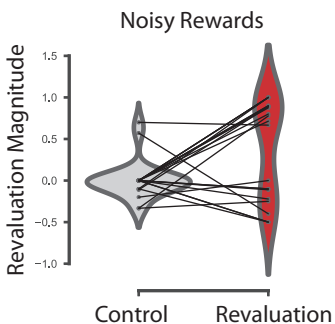

C

Noisy Reward Conditions

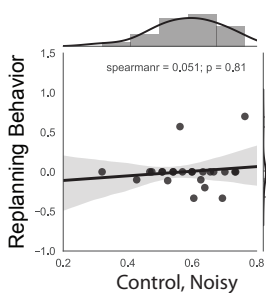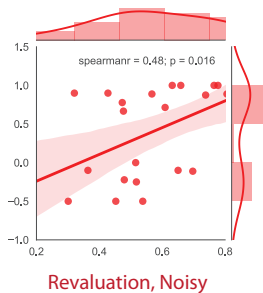

Noiseless Reward Conditions

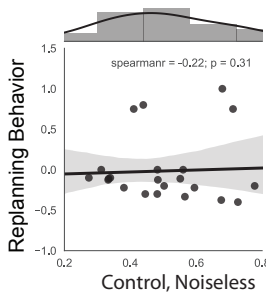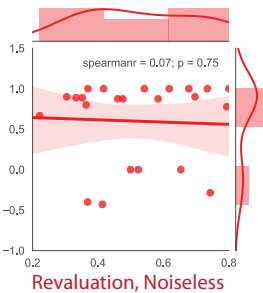

Supplement: supp [file elife_poa_e32548_Figure_2_figure_supplement_1.pdf › elife_poa_e32548_Figure_2_figure_supplement_1.pdf]
